# Supplementary material for: The development of the Screening of Visual Complaints questionnaire for patients with neurodegenerative disorders: Evaluation of psychometric features in a community sample
Source: PubMed Central journal article supplement (PMC7190154; doi:10.1371/journal.pone.0232232), 2020-04-29
Supplement: pone.0232232.s001.pdf [file pone.0232232.s001.pdf]

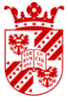

## SCREENING VISUELE KLACHTEN (SVK)

Datum: .....

Naam: .....

Geslacht: .....

Geboortedatum: .....

Wat is uw hoogst afgeronde opleiding? .....

**Dit is een vragenlijst met uitspraken over problemen die met uw zicht te maken hebben. Als u een bril of contactlenzen heeft, ga er dan bij de beantwoording van de vragen vanuit dat u deze draagt.**

**Elke vraag heeft meerdere antwoordmogelijkheden. Kies het antwoord dat het meest op u van toepassing is. Het gaat daarbij steeds om de afgelopen weken.**

**Als u niet zeker weet welk antwoord u moet kiezen, geef dan het best passende antwoord.**

**Kruis bij alle volgende vragen s.v.p. 1 antwoord aan. Er zijn in totaal 3 pagina's.**

|                                                                       | Ja                       | Nee                      |
|-----------------------------------------------------------------------|--------------------------|--------------------------|
| Bent u bekend bij een oogarts?                                        | <input type="checkbox"/> | <input type="checkbox"/> |
| Indien 'Ja':<br>Bij welke oogarts (of welk ziekenhuis) bent u bekend? | <input type="text"/>     |                          |
| Voor welke oogheekundige aandoening(en) bent u bekend bij de oogarts? | <input type="text"/>     |                          |

|                                                                                                   | Nee/<br>nauwelijks       | Soms                     | Vaak/<br>altijd          |
|---------------------------------------------------------------------------------------------------|--------------------------|--------------------------|--------------------------|
| 1 Ervaart u in het dagelijks leven problemen met uw zicht?                                        | <input type="checkbox"/> | <input type="checkbox"/> | <input type="checkbox"/> |
| Indien 'Soms' of 'Vaak/altijd': Kunt u aangeven welke problemen of klachten u heeft met uw zicht? |                          |                          |                          |
| a.                                                                                                | <input type="text"/>     |                          |                          |
| b.                                                                                                | <input type="text"/>     |                          |                          |
| c.                                                                                                | <input type="text"/>     |                          |                          |
| d.                                                                                                | <input type="text"/>     |                          |                          |

|                                                                                                                                                 | <b>Nee/<br/>nauwelijks</b> | <b>Soms</b>              | <b>Vaak/<br/>altijd</b>  |
|-------------------------------------------------------------------------------------------------------------------------------------------------|----------------------------|--------------------------|--------------------------|
| 2 Heeft u de indruk dat u minder scherp bent gaan zien?                                                                                         | <input type="checkbox"/>   | <input type="checkbox"/> | <input type="checkbox"/> |
| 3 Heeft u moeite met scherpstellen of duurt het langer voordat u een scherp beeld heeft?                                                        | <input type="checkbox"/>   | <input type="checkbox"/> | <input type="checkbox"/> |
| 4 Heeft u last van dubbelzien of dubbelbeelden?                                                                                                 | <input type="checkbox"/>   | <input type="checkbox"/> | <input type="checkbox"/> |
| 5 Heeft u moeite met dieptezien of afstanden inschatten?                                                                                        | <input type="checkbox"/>   | <input type="checkbox"/> | <input type="checkbox"/> |
| 6 Heeft u last van trillende, schokkerige of bewegende beelden?                                                                                 | <input type="checkbox"/>   | <input type="checkbox"/> | <input type="checkbox"/> |
| 7 Heeft u het idee dat u delen mist in het gezichtsveld?                                                                                        | <input type="checkbox"/>   | <input type="checkbox"/> | <input type="checkbox"/> |
| 8 Ervaart u kleuren anders dan vroeger?                                                                                                         | <input type="checkbox"/>   | <input type="checkbox"/> | <input type="checkbox"/> |
| 9 Heeft u moeite met het zien bij verminderd contrast (bijv. wanneer letters niet zijn afgedrukt op een witte, maar op een grijze achtergrond)? | <input type="checkbox"/>   | <input type="checkbox"/> | <input type="checkbox"/> |
| 10 Wordt u, meer dan vroeger, verblind door fel licht?                                                                                          | <input type="checkbox"/>   | <input type="checkbox"/> | <input type="checkbox"/> |
| 11 Heeft u de indruk dat alles donkerder lijkt of heeft u meer behoefte aan licht dan vroeger?                                                  | <input type="checkbox"/>   | <input type="checkbox"/> | <input type="checkbox"/> |
| 12 Heeft u moeite met het wennen aan licht of donker?                                                                                           | <input type="checkbox"/>   | <input type="checkbox"/> | <input type="checkbox"/> |
| 13 Ziet u wel eens dingen die anderen niet zien (denk bijv. aan flitsen, patronen, voorwerpen of dieren)?                                       | <input type="checkbox"/>   | <input type="checkbox"/> | <input type="checkbox"/> |
| 14 Heeft u de indruk dat u voorwerpen of gezichten anders waarneemt, bijvoorbeeld vervormd of met nabeelden?                                    | <input type="checkbox"/>   | <input type="checkbox"/> | <input type="checkbox"/> |
| 15 Heeft u pijn aan uw ogen?                                                                                                                    | <input type="checkbox"/>   | <input type="checkbox"/> | <input type="checkbox"/> |

|                                                                                                      | Nee/<br>nauwelijks       | Soms                     | Vaak/<br>altijd          |
|------------------------------------------------------------------------------------------------------|--------------------------|--------------------------|--------------------------|
| 16 Heeft u last van droge ogen?                                                                      | <input type="checkbox"/> | <input type="checkbox"/> | <input type="checkbox"/> |
| 17 Heeft u het idee dat u meer tijd nodig hebt om dingen te zien?                                    | <input type="checkbox"/> | <input type="checkbox"/> | <input type="checkbox"/> |
| 18 Heeft u moeite met zien of waarnemen bij deelname aan het verkeer (lopen, fietsen en autorijden)? | <input type="checkbox"/> | <input type="checkbox"/> | <input type="checkbox"/> |
| 19 Heeft u, <u>vanwege uw zicht</u> , moeite met het zoeken en vinden van dingen?                    | <input type="checkbox"/> | <input type="checkbox"/> | <input type="checkbox"/> |
| 20 Heeft u, <u>vanwege uw zicht</u> , moeite met lezen?                                              | <input type="checkbox"/> | <input type="checkbox"/> | <input type="checkbox"/> |

**Geef een cijfer van 0 tot 10**  
(omcirkel het juiste antwoord)

21 In hoeverre wordt u in het dagelijks leven gehinderd door bovenstaande klachten met betrekking tot het zien?

0 1 2 3 4 5 6 7 8 9 10

0 = geen hinder

10 = zeer ernstige hinder

|                                                                                           | Ja                       | Nee                      |
|-------------------------------------------------------------------------------------------|--------------------------|--------------------------|
| Stelt u advies, onderzoek en/of revalidatie voor de hierboven genoemde klachten op prijs? | <input type="checkbox"/> | <input type="checkbox"/> |

Wilt u controleren of u alle vragen heeft beantwoord?  
Bij elke vraag dient 1 antwoord aangekruist te zijn.

**Dank u wel. Dit is het einde van de vragenlijst.**
