# Supplementary material for: The development of the Screening of Visual Complaints questionnaire for patients with neurodegenerative disorders: Evaluation of psychometric features in a community sample
Source: PubMed Central journal article supplement (PMC7190154; doi:10.1371/journal.pone.0232232), 2020-04-29
Supplement: pone.0232232.s002.pdf [file pone.0232232.s002.pdf]

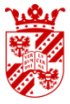

## SCREENING VISUAL COMPLAINTS (SVC)

*DISCLAIMER: The following questionnaire is a first English translation of the original Dutch questionnaire. This English version has not been validated yet and therefore does not guarantee similar validity and reliability as the Dutch version.*

Date: .....

Name: .....

Sex: .....

Date of birth: .....

What is your highest level of education? .....

**The following list of questions concerns problems that you may have with your eyesight. If you wear glasses or contact lenses, please assume that you are wearing these when you answer the questions.**

**Each question has several possible answers. Please choose the answer that is most appropriate to your situation as it has been over the past weeks.**

**If you are not certain, please choose the answer that best reflects your situation.**

**Please choose 1 answer for each of the following questions. The questionnaire consists of 3 pages.**

|                                        | Yes                      | No                       |
|----------------------------------------|--------------------------|--------------------------|
| Did you ever visit an ophthalmologist? | <input type="checkbox"/> | <input type="checkbox"/> |

If 'Yes':

Which ophthalmologist did you visit or at which hospital did you visit an ophthalmologist?

For which ophthalmologic condition did you visit an ophthalmologist?

|                                                                | No/<br>Hardly<br>ever    | Sometimes                | Often/<br>Always         |
|----------------------------------------------------------------|--------------------------|--------------------------|--------------------------|
| 1 Do you experience problems with your eyesight in daily life? | <input type="checkbox"/> | <input type="checkbox"/> | <input type="checkbox"/> |

If 'Sometimes' or 'Often/Always': please describe your problems or complaints regarding your eyesight

a.

b.

|    |                                                                                                                                      | <b>No/<br/>Hardly<br/>ever</b> | <b>Sometimes</b>         | <b>Often/<br/>Always</b> |
|----|--------------------------------------------------------------------------------------------------------------------------------------|--------------------------------|--------------------------|--------------------------|
|    | c.                                                                                                                                   |                                |                          |                          |
|    | d.                                                                                                                                   |                                |                          |                          |
| 2  | Do you have the impression that your vision has become less clear?                                                                   | <input type="checkbox"/>       | <input type="checkbox"/> | <input type="checkbox"/> |
| 3  | Do you have trouble focusing or does it take longer before things are in focus?                                                      | <input type="checkbox"/>       | <input type="checkbox"/> | <input type="checkbox"/> |
| 4  | Do you have double vision or see double images?                                                                                      | <input type="checkbox"/>       | <input type="checkbox"/> | <input type="checkbox"/> |
| 5  | Do you have problems with depth perception or estimating distances?                                                                  | <input type="checkbox"/>       | <input type="checkbox"/> | <input type="checkbox"/> |
| 6  | Do you see shaky, jerky or shifting images?                                                                                          | <input type="checkbox"/>       | <input type="checkbox"/> | <input type="checkbox"/> |
| 7  | Do you have the impression that you cannot see part(s) of the visual field?                                                          | <input type="checkbox"/>       | <input type="checkbox"/> | <input type="checkbox"/> |
| 8  | Do you experience colour differently than before?                                                                                    | <input type="checkbox"/>       | <input type="checkbox"/> | <input type="checkbox"/> |
| 9  | Do you have trouble seeing things at reduced contrast (e.g. letters that have not been printed on a white but on a grey background)? | <input type="checkbox"/>       | <input type="checkbox"/> | <input type="checkbox"/> |
| 10 | Are you more easily blinded by bright light than before?                                                                             | <input type="checkbox"/>       | <input type="checkbox"/> | <input type="checkbox"/> |
| 11 | Do you have the impression that everything looks darker or that you need more light than before?                                     | <input type="checkbox"/>       | <input type="checkbox"/> | <input type="checkbox"/> |
| 12 | Do you have difficulty adjusting to light or dark environments?                                                                      | <input type="checkbox"/>       | <input type="checkbox"/> | <input type="checkbox"/> |

|    |                                                                                                                        |                          |                          |                          |
|----|------------------------------------------------------------------------------------------------------------------------|--------------------------|--------------------------|--------------------------|
| 13 | Do you see things that others do not see (e.g. flashes of light, patterns, objects or animals)?                        | <input type="checkbox"/> | <input type="checkbox"/> | <input type="checkbox"/> |
| 14 | Do you have the impression that you perceive objects or faces differently, for example, distorted or with afterimages? | <input type="checkbox"/> | <input type="checkbox"/> | <input type="checkbox"/> |
| 15 | Are your eyes painful?                                                                                                 | <input type="checkbox"/> | <input type="checkbox"/> | <input type="checkbox"/> |
| 16 | Are you bothered by dry eyes?                                                                                          | <input type="checkbox"/> | <input type="checkbox"/> | <input type="checkbox"/> |
| 17 | Do you feel that you need more time to see things?                                                                     | <input type="checkbox"/> | <input type="checkbox"/> | <input type="checkbox"/> |
| 18 | Do you have vision problems when you participate in traffic (walking, cycling or driving)?                             | <input type="checkbox"/> | <input type="checkbox"/> | <input type="checkbox"/> |
| 19 | Do you have trouble looking for objects and finding objects <u>due to your eyesight</u> ?                              | <input type="checkbox"/> | <input type="checkbox"/> | <input type="checkbox"/> |
| 20 | Do you have trouble reading <u>due to your eyesight</u> ?                                                              | <input type="checkbox"/> | <input type="checkbox"/> | <input type="checkbox"/> |

**Please indicate your answer on a scale of 0 to 10**  
(please circle the relevant answer)

21 To what extent do you experience limitations in daily life due to the above mentioned problems with eyesight?

0 1 2 3 4 5 6 7 8 9 10

0 = no limitations

10 = very severe limitations

|                                                                                                  | Yes                      | No                       |
|--------------------------------------------------------------------------------------------------|--------------------------|--------------------------|
| Would you appreciate advice, assessment and/or rehabilitation for the abovementioned complaints? | <input type="checkbox"/> | <input type="checkbox"/> |

Please check whether you answered all questions.  
One answer must be ticked for each question.

**Thank you very much. This is the end of the questionnaire.**
