# Supplementary material for: The development of the Screening of Visual Complaints questionnaire for patients with neurodegenerative disorders: Evaluation of psychometric features in a community sample
Source: PubMed Central journal article supplement (PMC7190154; doi:10.1371/journal.pone.0232232), 2020-04-29
Supplement: pone.0232232.s003.pdf [file pone.0232232.s003.pdf]

**S3 Appendix. Results of convergent validity, divergent validity, test-retest reliability and the relation with participation in daily life for the data without SVC zero scores.**

**Table 1. Convergent validity of the SVC with the CVC-q and the NEI-VFQ-25.**

|                                       | <b>SVC total score</b> | <b>1. Diminished<br/>visual<br/>perception</b> | <b>2. Altered<br/>visual<br/>perception</b> | <b>3. Ocular<br/>discomfort</b> |
|---------------------------------------|------------------------|------------------------------------------------|---------------------------------------------|---------------------------------|
| CVC-q total score                     | 0.81*                  | 0.80*                                          | 0.47                                        | 0.21                            |
| NEI-VFQ-25 <sup>a</sup> – total score | -0.68*                 | -0.64*                                         | -0.37                                       | -0.32                           |
| General health <sup>b</sup>           | -0.32                  | -0.30                                          | -0.22                                       | -0.14                           |
| General vision <sup>b</sup>           | -0.53*                 | -0.52*                                         | -0.34                                       | -0.16                           |
| Near activities                       | -0.53*                 | -0.55*                                         | -0.27                                       | -0.13                           |
| Distance activities                   | -0.54*                 | -0.52*                                         | -0.32                                       | -0.22                           |
| Driving                               | -0.41                  | -0.42                                          | -0.18                                       | -0.14                           |
| Peripheral vision <sup>c</sup>        | -0.41                  | -0.38                                          | -0.31                                       | -0.17                           |
| Color vision <sup>c</sup>             | -0.21                  | -0.20                                          | -0.19                                       | -0.06 <sup>d</sup>              |
| Ocular pain <sup>b</sup>              | -0.43                  | -0.32                                          | -0.23                                       | -0.56*                          |
| Role difficulties                     | -0.49                  | -0.48                                          | -0.27                                       | -0.15                           |
| Dependency                            | -0.30                  | -0.28                                          | -0.25                                       | -0.15                           |
| Social functioning                    | -0.34                  | -0.32                                          | -0.31                                       | -0.10                           |
| Mental health                         | -0.53*                 | -0.52*                                         | -0.33                                       | -0.18                           |

All p-values <0.001 (except for <sup>d</sup>, p=0.053)

SVC, Screening of Visual Complaints questionnaire; CVC-q, Cerebral Visual Complaints questionnaire; NEI-VFQ-25, National Eye Institute Visual Function Questionnaire-25

<sup>a</sup> In contrast to the SVC and the CVC-q, a higher score on the NEI-VFQ-25 questionnaire indicates better visual function; <sup>b</sup> Subscale composed of two items; <sup>c</sup> Subscale composed of a single item

\* Correlations of high strength according to Cohen's criteria

**Table 2. Divergent validity of the SVC with the BRIEF-A, the FEDA, the DASS-21 and the SIMS.**

|                          | <b>SVC total score</b> | <b>1. Diminished<br/>visual perception</b> | <b>2. Altered visual<br/>perception</b> | <b>3. Ocular<br/>discomfort</b> |
|--------------------------|------------------------|--------------------------------------------|-----------------------------------------|---------------------------------|
| BRIEF-A – total score    | 0.26 <sup>#</sup>      | 0.23 <sup>#</sup>                          | 0.22 <sup>#</sup>                       | 0.09 <sup>#,a</sup>             |
| Metacognition            | 0.24 <sup>#</sup>      | 0.21 <sup>#</sup>                          | 0.19 <sup>#</sup>                       | 0.09 <sup>#,b</sup>             |
| Behavioral<br>regulation | 0.25 <sup>#</sup>      | 0.21 <sup>#</sup>                          | 0.21 <sup>#</sup>                       | 0.08 <sup>#,c</sup>             |
| FEDA                     | 0.38                   | 0.35                                       | 0.29 <sup>#</sup>                       | 0.15 <sup>#</sup>               |
| DASS-21 – total score    | 0.31                   | 0.26 <sup>#</sup>                          | 0.26 <sup>#</sup>                       | 0.16 <sup>#</sup>               |
| Depression               | 0.23 <sup>#</sup>      | 0.20 <sup>#</sup>                          | 0.21 <sup>#</sup>                       | 0.09 <sup>#</sup>               |
| Anxiety                  | 0.33                   | 0.26 <sup>#</sup>                          | 0.27 <sup>#</sup>                       | 0.24 <sup>#</sup>               |
| Stress                   | 0.23 <sup>#</sup>      | 0.20 <sup>#</sup>                          | 0.20 <sup>#</sup>                       | 0.14 <sup>#</sup>               |

SIMS 0.27# 0.24# 0.22# 0.19#

All p-values <0.001 (except for <sup>a</sup>, p=0.002; <sup>b</sup>, p=0.004; <sup>c</sup>, p=0.005)

SVC, Screening of Visual Complaints questionnaire; BRIEF-A, Behavior Rating Inventory of Executive Function-Adults; FEDA, Questionnaire for Experiences of Attention Deficits (*Fragebogen erlebter Defizite der Aufmerksamkeit*); DASS-21, Depression Anxiety Stress Scale–21; SIMS, Structured Inventory for Malingered Symptomatology

# Correlations of low strength according to Cohen's criteria

**Table 3. Internal consistency of the SVC**

| Factor                          | Number of items | Cronbach's alpha [CI]   |
|---------------------------------|-----------------|-------------------------|
| 1. Diminished visual perception | 11              | 0.80 [0.79-0.82]        |
| 2. Altered visual perception    | 6               | 0.61 [0.57-0.64]        |
| 3. Ocular discomfort            | 2               | 0.46 [0.40-0.52]        |
| <b>SVC Total</b>                | <b>19</b>       | <b>0.82 [0.81-0.84]</b> |

CI= Confidence Interval

**Table 4. Test-retest reliability of the SVC**

| Factor                          | Number of items | ICC [CI]                |
|---------------------------------|-----------------|-------------------------|
| 1. Diminished visual perception | 11              | 0.80 [0.69-0.88]        |
| 2. Altered visual perception    | 6               | 0.75 [0.60-0.84]        |
| 3. Ocular discomfort            | 2               | 0.62 [0.43-0.76]        |
| <b>SVC Total</b>                | <b>19</b>       | <b>0.77 [0.63-0.86]</b> |

ICC = Intraclass correlation coefficient; CI= Confidence Interval

The weighted Kappa coefficient for item 21 of limitations in daily life was 0.65.

**Table 5. Relation of the SVC with self-related limitation in daily life and the USER**

|                               | SVC total score |
|-------------------------------|-----------------|
| SVC limitations in daily life | 0.63**          |
| USER subscale frequency       | -0.04           |
| USER subscale satisfaction    | -0.19**         |

SVC, Screening of Visual Complaints questionnaire; USER, Utrecht Scale for Evaluation of Rehabilitation-Participation

\*\* p<0.001
